# Supplementary material for: Styrene–isoprene and styrene–1,3-pentadiene copolymerisation catalyzed by titanium [OSSO]-type catalysts
Source: Royal Society of Chemistry journal article supplement (doi:10.1039/c5ra11866b), 2015-01-01
Supplement: c5ra11866b1.pdf [file c5ra11866b1.pdf]

## Supporting Information

---

### **Styrene-Isoprene and Styrene-1,3-Pentadiene Copolymerisation Catalyzed by Titanium [OSSO]-type Catalysts**

Marianna Loria, Antonio Proto, Carmine Capacchione\*

*Dipartimento di Chimica e Biologia, Università degli Studi di Salerno, via Giovanni Paolo II, 132 I-84084  
Fisciano(SA), Italy*

*Fax: +39089-969603; e-mail: ccapacchione@unisa.it*

---

## Table of Contents

### 1. NMR ANALYSIS

#### 1.1 NMR analysis of polyisoprene homopolymers synthesized by 1/MAO and 2/MAO

**Figure S1.** Aliphatic region of the  $^{13}\text{C}$  NMR spectra ( $\text{CDCl}_3$ ,  $\delta$  in ppm) of entry 1 (a) and entry 7 (b).

#### 1.2 NMR analysis of isotactic poly(styrene)-co-isoprene copolymers synthesized by 1/MAO

**Figure S2.** Aliphatic region of the  $^{13}\text{C}$  NMR spectra ( $\text{CDCl}_3$ ,  $\delta$  in ppm) of samples: entry 2 (a,  $x_s = 0.02$ ), entry 4 (b,  $x_s = 0.05$ ), entry 5 (c,  $x_s = 0.1$ ), entry 6 (d,  $x_s = 0.5$ ) of table 1.

**Figure S3.** Aliphatic region of  $^{13}\text{C}$  NMR spectrum ( $\text{CDCl}_3$ ,  $\delta$  in ppm)(a) and DEPT 135 (b) of entry 3 ( $x_s=0.03$ ).

#### 1.3 NMR analysis of isotactic poly(styrene)-co-isoprene copolymers synthesized by 2/MAO

**Figure S4.** Aliphatic region of the  $^{13}\text{C}$  NMR spectra ( $\text{CDCl}_3$ ,  $\delta$  in ppm) of samples: entry 8 (a,  $x_s = 0.02$ ), entry 10 (b,  $x_s = 0.05$ ), entry 11 (c,  $x_s = 0.1$ ), entry 12 (d,  $x_s = 0.2$ ), entry 13 (e,  $x_s = 0.5$ ) of table 1.

#### 1.4 NMR analysis of poly-1,3-pentadiene homopolymers synthesized by 1/MAO and 2/MAO

**Figure S5.** Aliphatic region of the  $^{13}\text{C}$  NMR spectra ( $\text{CDCl}_3$ ,  $\delta$  in ppm) of entry 14 (a) and entry 21 (b).

#### 1.5 NMR analysis of isotactic poly(styrene)-co-1,3-pentadiene copolymers synthesized by 1/MAO

**Figure S6.** Aliphatic region of the  $^{13}\text{C}$  NMR ( $\text{CDCl}_3$ ,  $\delta$  in ppm) spectra of samples: entry 16 (a,  $x_s = 0.03$ ), entry 17 (b,  $x_s = 0.1$ ), entry 18 (c,  $x_s = 0.3$ ), entry 19 (d,  $x_s = 0.5$ ), entry 20 (e,  $x_s = 0.7$ ) of table 2.

#### 1.6 NMR analysis of isotactic poly(styrene)-co-1,3-pentadiene copolymers synthesized by 2/MAO

**Figure S7.** Aliphatic region of the  $^{13}\text{C}$  NMR ( $\text{CDCl}_3$ ,  $\delta$  in ppm) spectra of samples: entry 22 (a,  $x_s = 0.02$ ), entry 24 (b,  $x_s = 0.1$ ), entry 25 (c,  $x_s = 0.3$ ), entry 26 (d,  $x_s = 0.5$ ), entry 27 (e,  $x_s = 0.7$ ) of table 2.

**Figure S8.** Aliphatic region of  $^{13}\text{C}$  NMR spectrum ( $\text{CDCl}_3$ ,  $\delta$  in ppm)(a) and DEPT 135 (b) of entry 23 ( $x_s=0.03$ ).

**Figure S9.** Aliphatic region of  $^{13}\text{C}$  NMR spectrum ( $\text{CDCl}_3$ ,  $\delta$  in ppm)(a) and DEPT 135 (b) of entry 25 ( $x_s=0.3$ ).

**Figure S10.** Aliphatic region of  $^{13}\text{C}$  NMR spectrum ( $\text{CDCl}_3$ ,  $\delta$  in ppm)(a) and DEPT 135 (b) of entry 26 ( $x_s=0.5$ ).

### 2. EVALUATION OF THE AVERAGE STYRENE BLOCK LENGTH

#### 2.1 Average styrene block lengths for isotactic poly(styrene)-co-isoprene copolymers synthesized by 1/MAO

#### 2.2 Average styrene block lengths for isotactic poly(styrene)-co-1,3-pentadiene copolymers synthesized by 1/MAO and 2/MAO

### 3. DSC ANALYSIS

#### 3.1 DSC analysis of polyisoprene homopolymers synthesized by 1 and 2/MAO

**Figure S11.** DSC curves of samples listed in Table 1: entry 1 (a), entry 7 (b).

#### 3.2 DSC analysis of isotactic poly(styrene)-co-isoprene copolymers synthesized by 1/MAO

**Figure S12.** DSC curves of samples listed in Table 1: entry 2 (a), entry 3 ( b), entry 4 (c), entry 5 (d), entry 6 (e).

3.3 DSC analysis of isotactic poly(styrene)-co-isoprene copolymers synthesized by 2/MAO

**Figure S13.** DSC curves of samples listed in Table 1: entry 8 (a), entry 10 (b), entry 11 (c), entry 12 (d), entry 13 (e).

3.4 DSC analysis of poly-1,3-pentadiene homopolymers synthesized by 1 and 2/MAO

**Figure S14.** DSC curves of samples listed in Table 3: entry 14 (a), entry 21 ( b).

3.5 DSC analysis of isotactic poly(styrene)-co-1,3-pentadiene copolymers synthesized by 1/MAO

**Figure S15.** DSC curves of entries listed in Table 2: entry 15 (a), entry 16 ( b), entry 17 (c), entry 18 (d), entry 19 (e), entry 20 (f).

3.6 DSC analysis of isotactic poly(styrene)-co-1,3-pentadiene copolymers synthesized by 2/MAO

**Figure S16.** DSC curves of samples listed in Table 2: entry 22 (a), entry 23 (b), entry 24 (c), entry 25 (d), entry 26 (e), entry 27 (f).

## 1. NMR ANALYSIS

### 1.1 NMR analysis of polyisoprene homopolymers synthesized by 1/MAO and 2/MAO

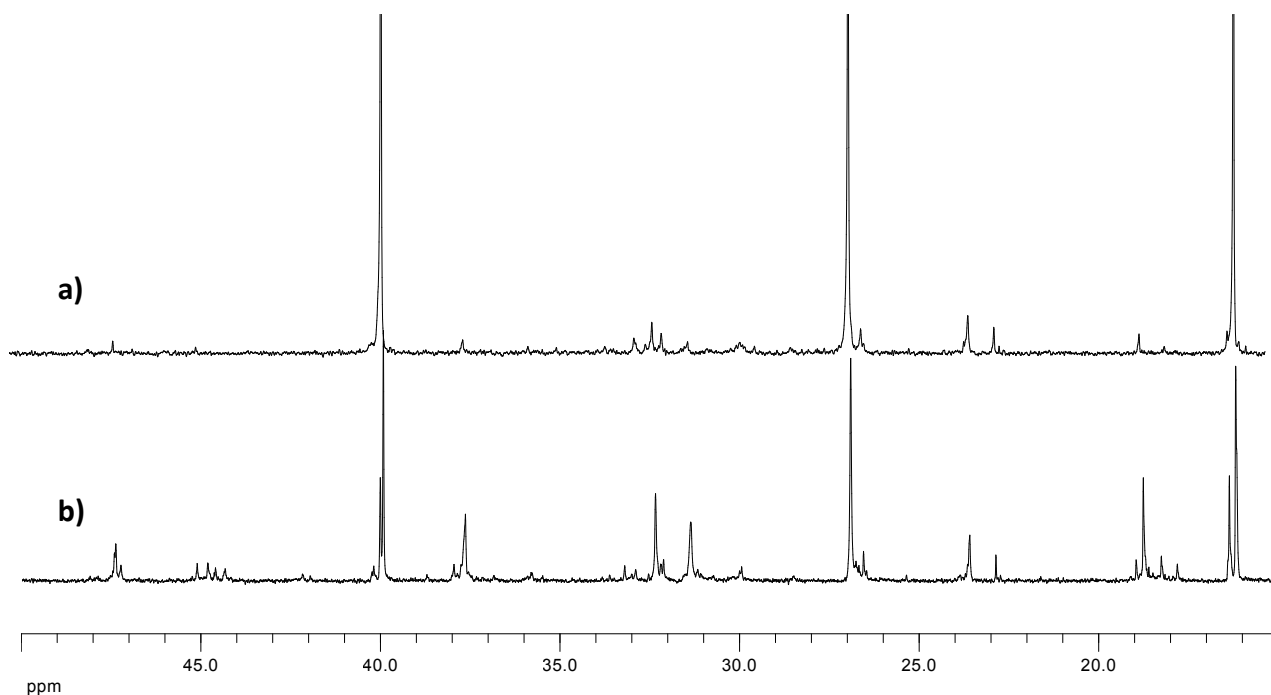

**Figure S1.** Aliphatic region of the  $^{13}\text{C}$  NMR spectra ( $\text{CDCl}_3$ ,  $\delta$  in ppm) of entry 1 (a) and entry 7 (b).

### 1.2 NMR analysis of isotactic poly(styrene)-co-isoprene copolymers synthesized by 1/MAO

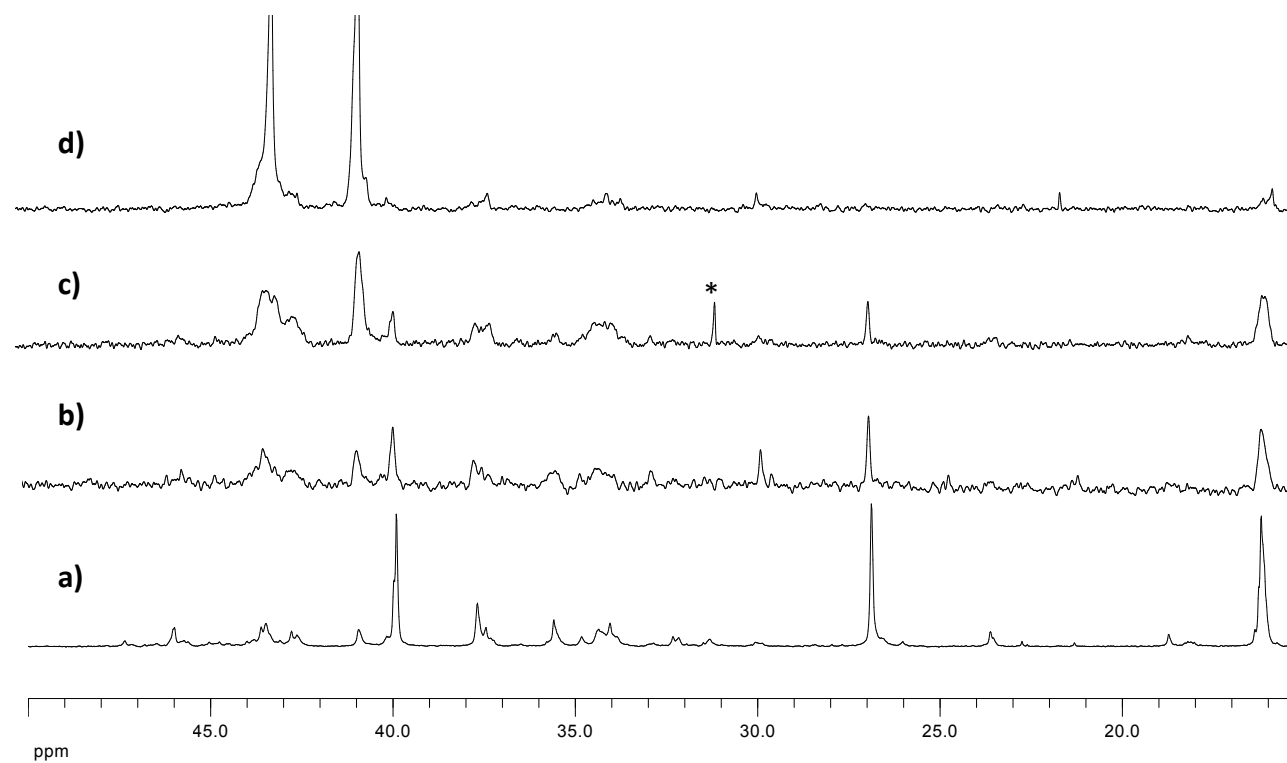

**Figure S2.** Aliphatic region of the  $^{13}\text{C}$  NMR spectra ( $\text{CDCl}_3$ ,  $\delta$  in ppm) of samples: entry 2 (a,  $x_s = 0.33$ ), entry 4 (b,  $x_s = 0.77$ ), entry 5 (c,  $x_s = 0.86$ ), entry 6 (d,  $x_s = 0.98$ ) of table 1. Peak marked with \* is due to acetone impurity.

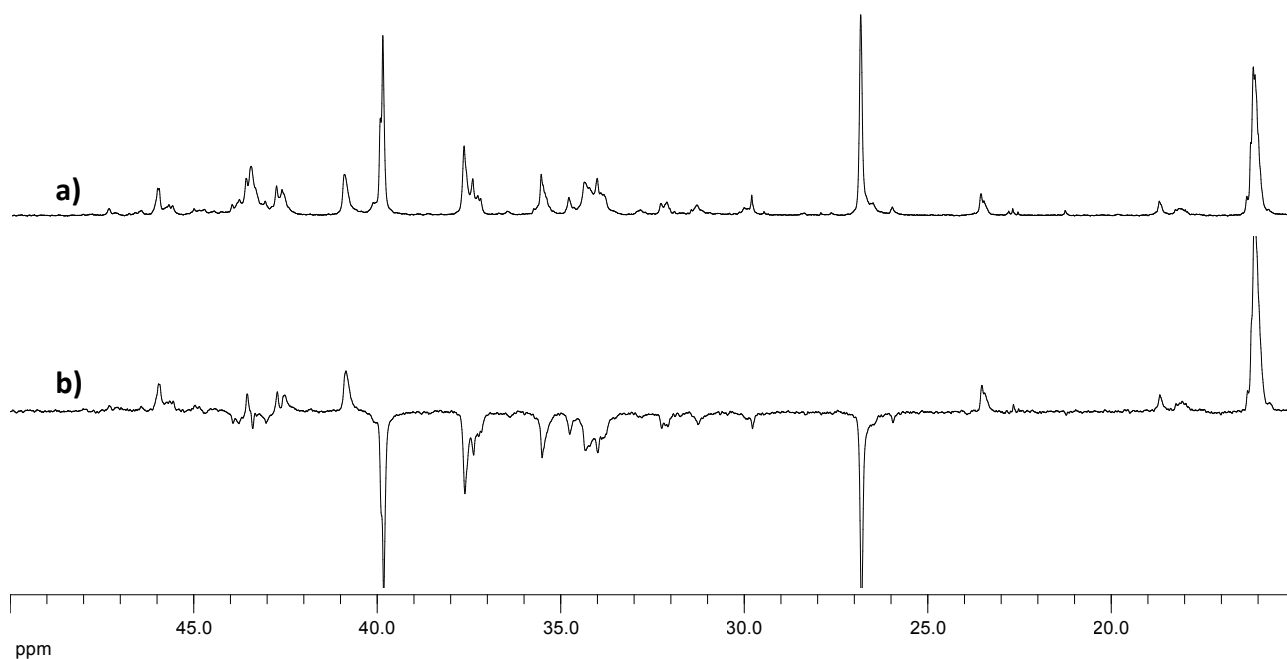

**Figure S3.** Aliphatic region of  $^{13}\text{C}$  NMR spectrum ( $\text{CDCl}_3$ ,  $\delta$  in ppm)(a) and DEPT 135 (b) of entry 3 ( $x_s=0.40$ ).

### 1.3 NMR analysis of isotactic poly(styrene)-co-isoprene copolymers synthesized by 2/MAO

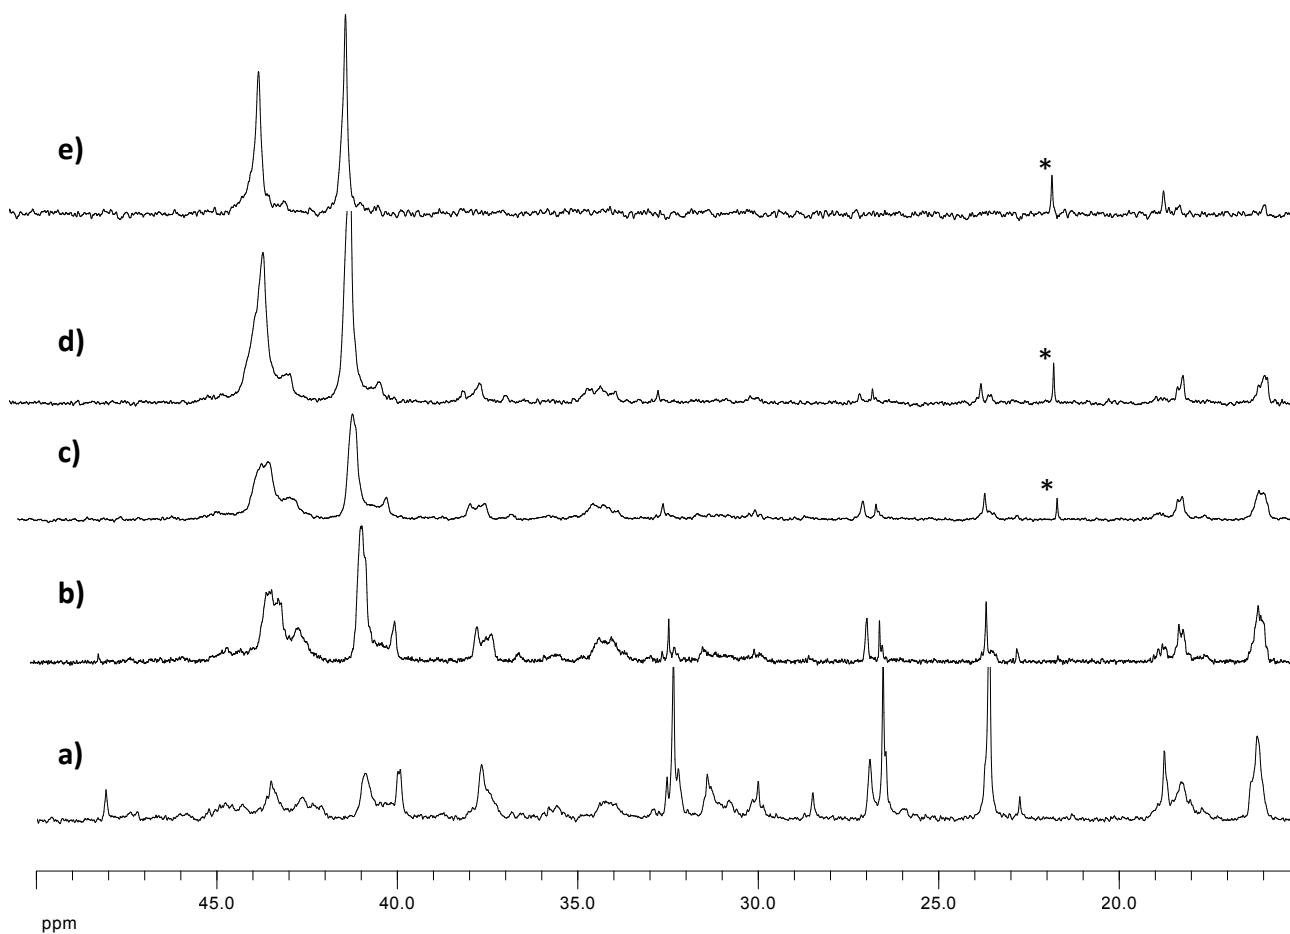

**Figure S4.** Aliphatic region of the  $^{13}\text{C}$  NMR spectra ( $\text{CDCl}_3$ ,  $\delta$  in ppm) of samples: entry 8 (a,  $x_s = 0.27$ ), entry 10 (b,  $x_s = 0.66$ ), entry 11 (c,  $x_s = 0.75$ ), entry 12 (d,  $x_s = 0.92$ ), entry 13 (e,  $x_s = 0.97$ ) of table 1. Peaks marked with \* are due to toluene impurity.

#### 1.4 NMR analysis of poly-1,3-pentadiene homopolymers synthesized by 1/MAO and 2/MAO

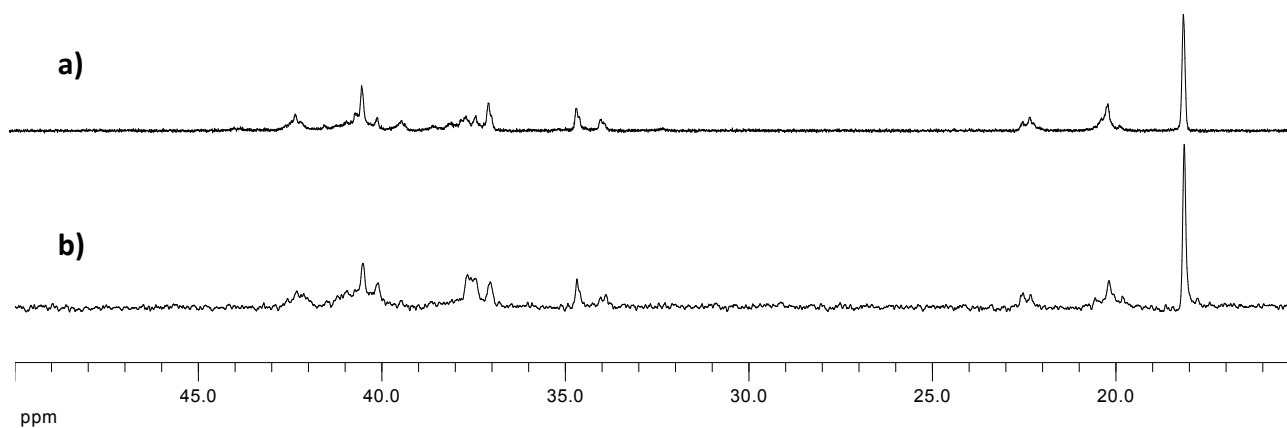

**Figure S5.** Aliphatic region of the  $^{13}\text{C}$  NMR spectra ( $\text{CDCl}_3$ ,  $\delta$  in ppm) of entry 14 (a) and entry 21 (b).

#### 1.5 NMR analysis of isotactic poly(styrene)-co-1,3-pentadiene copolymers synthesized by 1/MAO

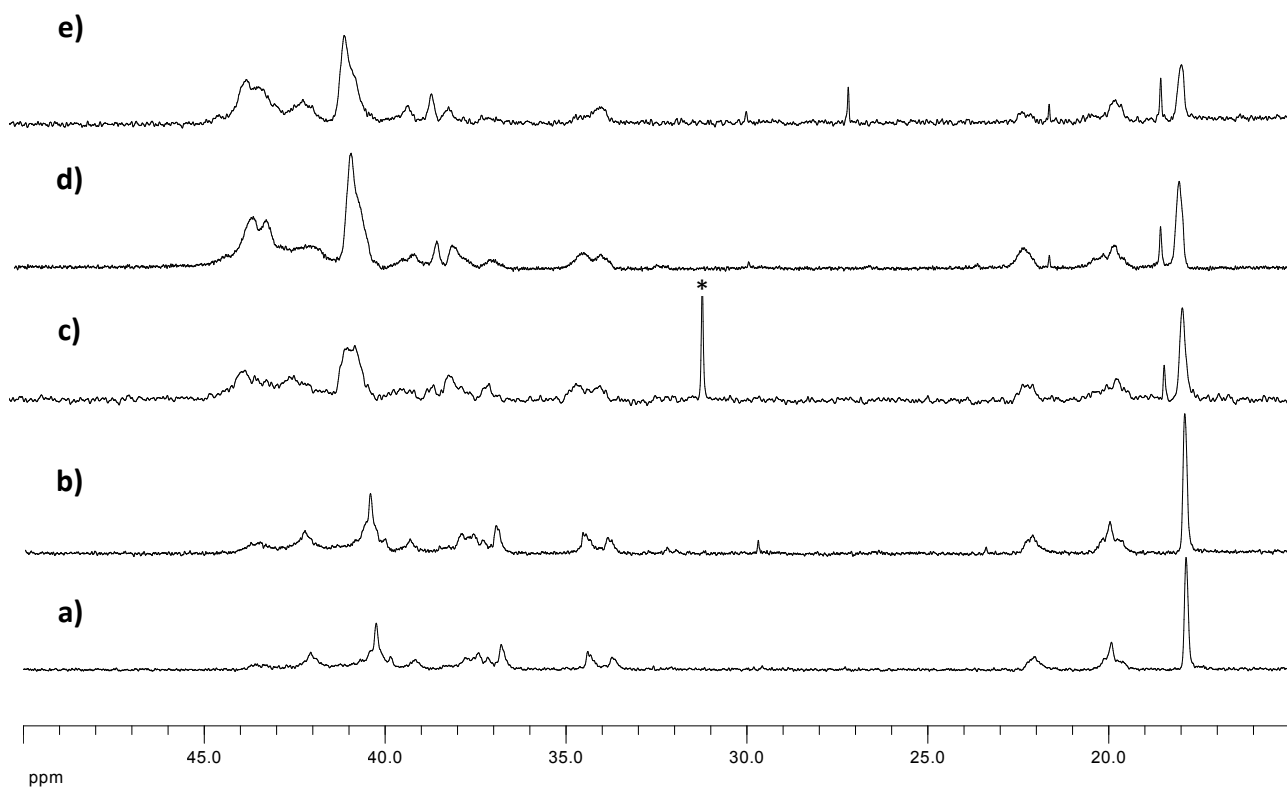

**Figure S6.** Aliphatic region of the  $^{13}\text{C}$  NMR ( $\text{CDCl}_3$ ,  $\delta$  in ppm) spectra of samples: entry 16 (a,  $x_s = 0.39$ ), entry 17 (b,  $x_s = 0.52$ ), entry 18 (c,  $x_s = 0.60$ ), entry 19 (d,  $x_s = 0.71$ ), entry 20 (e,  $x_s = 0.80$ ) of table 2. Peak marked with \* is due to acetone impurity.

## 1.6 NMR analysis of isotactic poly(styrene)-co-1,3-pentadiene copolymers synthesized by 2/MAO

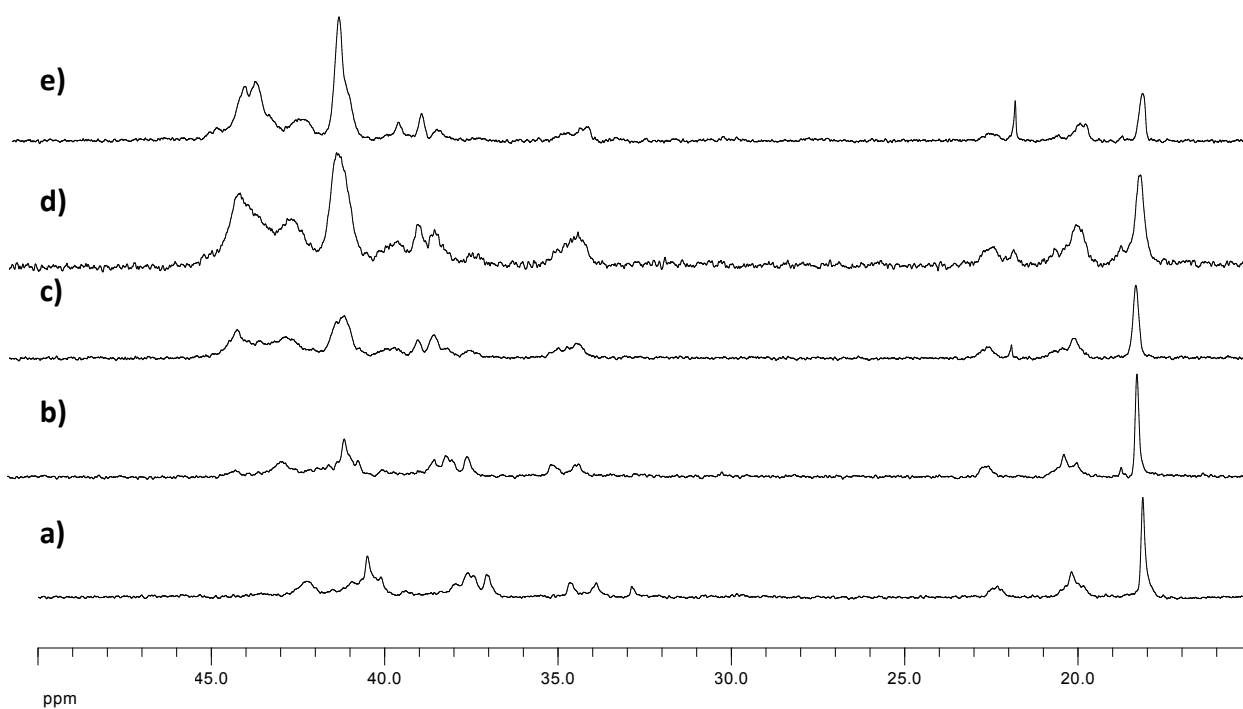

**Figure S7.** Aliphatic region of the  $^{13}\text{C}$  NMR ( $\text{CDCl}_3$ ,  $\delta$  in ppm) spectra of samples: entry 22 (a,  $x_s = 0.08$ ), entry 24 (b,  $x_s = 0.27$ ), entry 25 (c,  $x_s = 0.63$ ), entry 26 (d,  $x_s = 0.74$ ), entry 27 (e,  $x_s = 0.85$ ) of table 2.

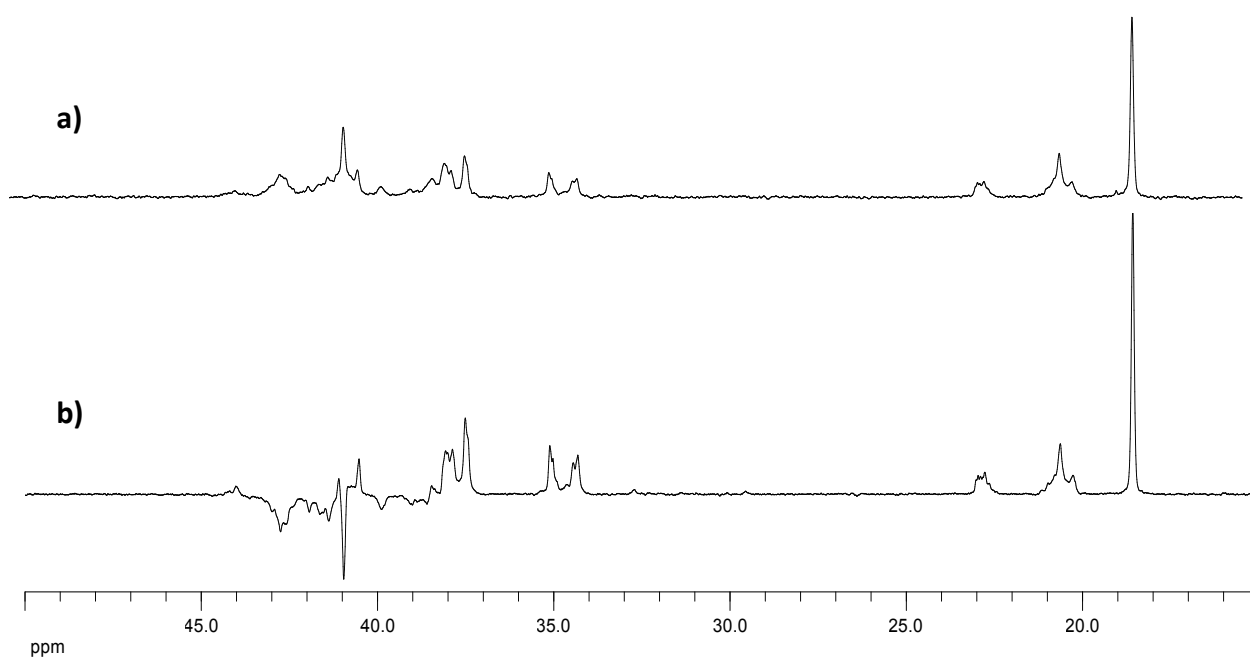

**Figure S8.** Aliphatic region of  $^{13}\text{C}$  NMR spectrum ( $\text{CDCl}_3$ ,  $\delta$  in ppm)(a) and DEPT 135 (b) of entry 23 ( $x_s = 0.13$ ).

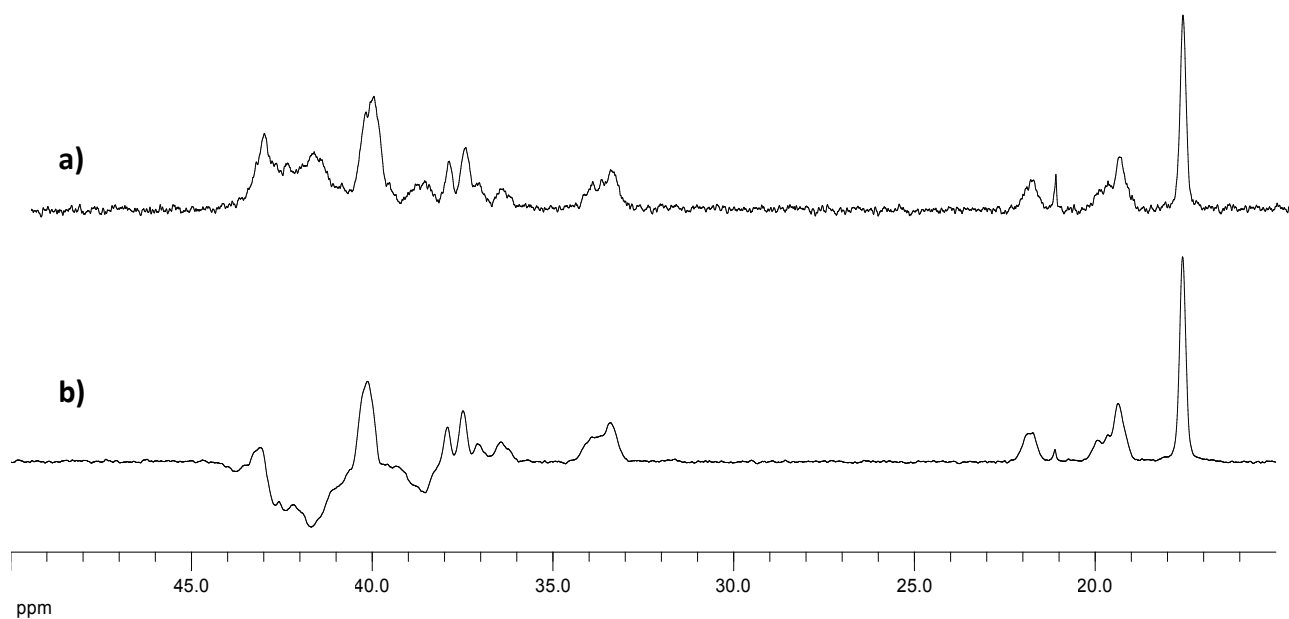

**Figure S9.** Aliphatic region of  $^{13}\text{C}$  NMR spectrum ( $\text{CDCl}_3$ ,  $\delta$  in ppm) (a) and DEPT 135 (b) of entry 25 ( $x_s=0.63$ ).

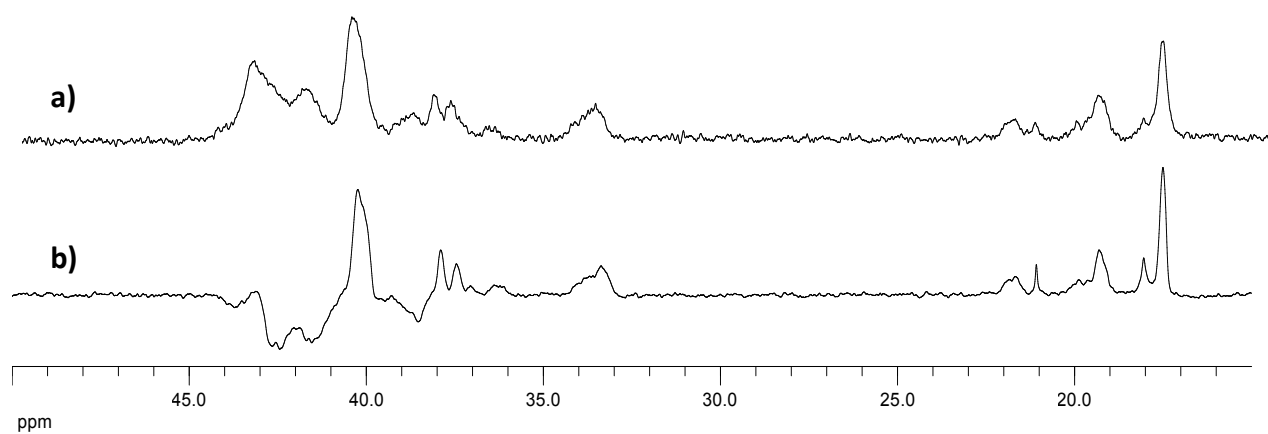

**Figure S10.** Aliphatic region of  $^{13}\text{C}$  NMR spectrum ( $\text{CDCl}_3$ ,  $\delta$  in ppm)(a) and DEPT 135 (b) of entry 26 ( $x_s=0.74$ ).



## 2. EVALUATION OF THE AVERAGE STYRENE BLOCK LENGTH

2.1 Average styrene block lengths for isotactic poly(styrene)-co-isoprene copolymers synthesized by 1 and 2/MAO

$$n_s = \frac{SSS + ISS + SSI + ISI}{ISI + \frac{1}{2}(ISS + SSI)}$$

$$= \frac{(SSS) + (CSS + VSS + TSS) + (SSC + SSV + SST) + (CSC + VSV + CST + CSV + VSC + VST + TST)}{(CSC + VSV + CST + CSV + VSC + VST + TST) + \frac{1}{2}[(CSS + VSS + TSS) + (SSC + SSV + SST)]}$$

$$\approx \frac{(SS_1S + SS_2S) + (CS_1S + CS_2S + TS_2S) + (SS_1C + SS_2T + SST_1 + SS_1T) + (C_4SC + CS_2C + TS_1S + TS_2S)}{(C_4SC + CS_2C + CS_1C + VS_1V + VS_1C' + TS_2T + TS_1T + TST_1) + \frac{1}{2}[(CS_1S + CS_2S) + (SS_1C + SS_2T + SST_1 + SS_1T)]}$$

2.2 Average styrene block lengths for isotactic poly(styrene)-co-1,3-pentadiene copolymers synthesized by 1/MAO and 2/MAO

$$n_s = \frac{SSS + DSS + SSD + DSD}{DSD + \frac{1}{2}(DSS + SSD)}$$

$$= \frac{(SSS) + (VSS + TSS) + (SSV + SST) + (VSV + VST + TST)}{(VSV + VST + TST) + \frac{1}{2}[(VSS + TSS) + (SSV + SST)]}$$

$$\approx \frac{(SS_1S + SS_2S) + (T_4SS) + (SS_1T + SS_2T) + (TS_4T)}{TS_4T + \frac{1}{2}[(T_4SS) + (SS_1T + SS_2T)]}$$

### 3. DSC ANALYSIS

#### 3.1 DSC analysis of polyisoprene homopolymers synthesized by 1 and 2/MAO

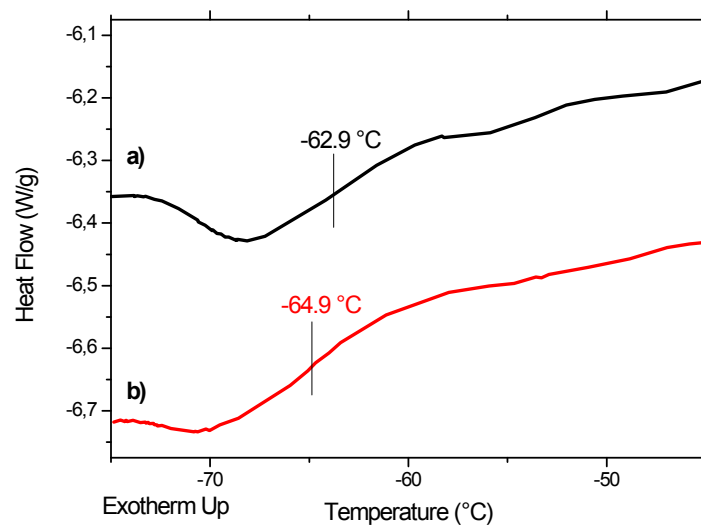

**Figure S11.** DSC curves of samples listed in Table 1: entry 1 (a), entry 7 (b).

#### 3.2 DSC analysis of isotactic poly(styrene)-co-isoprene copolymers synthesized by 1/MAO

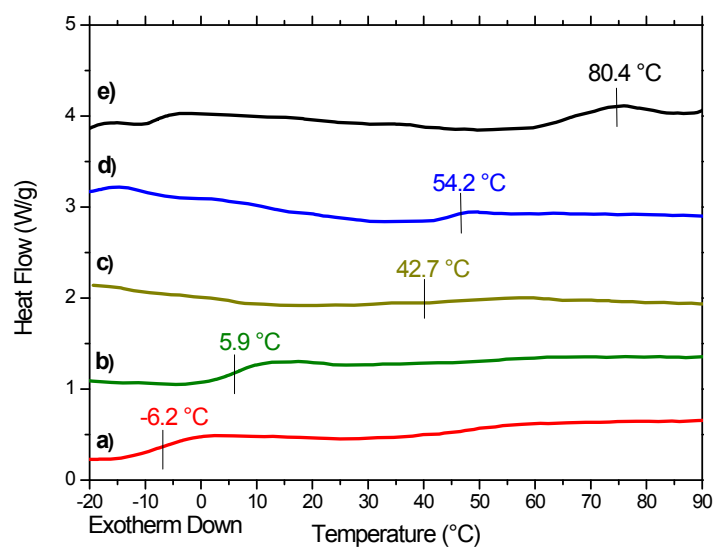

**Figure S12.** DSC curves of samples listed in Table 1: entry 2 (a), entry 3 (b), entry 4 (c), entry 5 (d), entry 6 (e).

### 3.3 DSC analysis of isotactic poly(styrene)-co-isoprene copolymers synthesized by 2/MAO

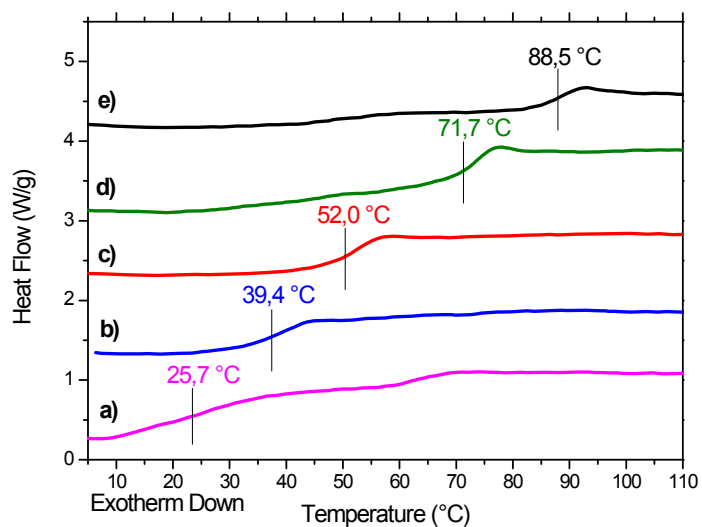

**Figure S13.** DSC curves of samples listed in Table 1: entry 8 (a), entry 10 (b), entry 11 (c), entry 12 (d), entry 13 (e).

### 3.4 DSC analysis of poly-1,3-pentadiene homopolymers synthesized by 1 and 2/MAO

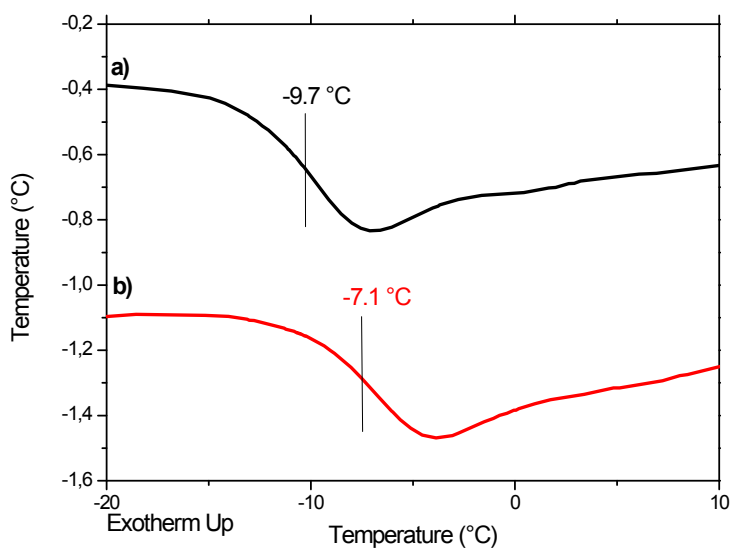

**Figure S14.** DSC curves of samples listed in Table 3: entry 14 (a), entry 21 (b).

### 3.5 DSC analysis of isotactic poly(styrene)-co-1,3-pentadiene copolymers synthesized by 1/MAO

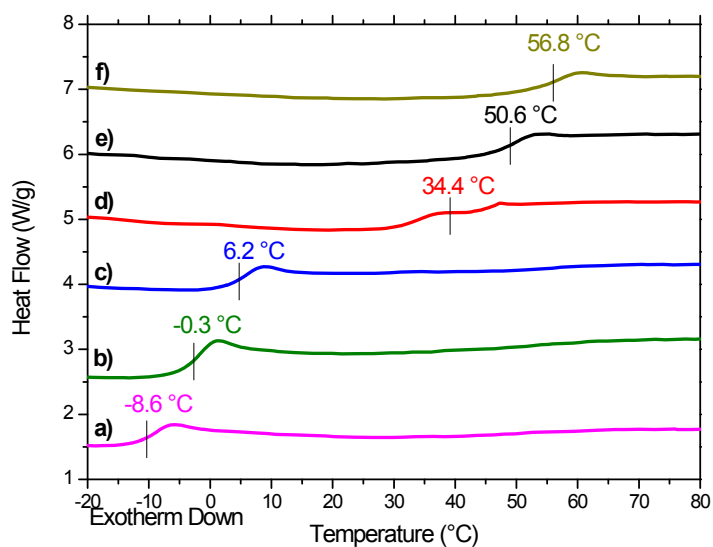

**Figure S15.** DSC curves of entries listed in Table 3: entry 15 (a), entry 16 (b), entry 17 (c), entry 18 (d), entry 19 (e), entry 20 (f).

### 3.6 DSC analysis of isotactic poly(styrene)-co-1,3-pentadiene copolymers synthesized by 2/MAO

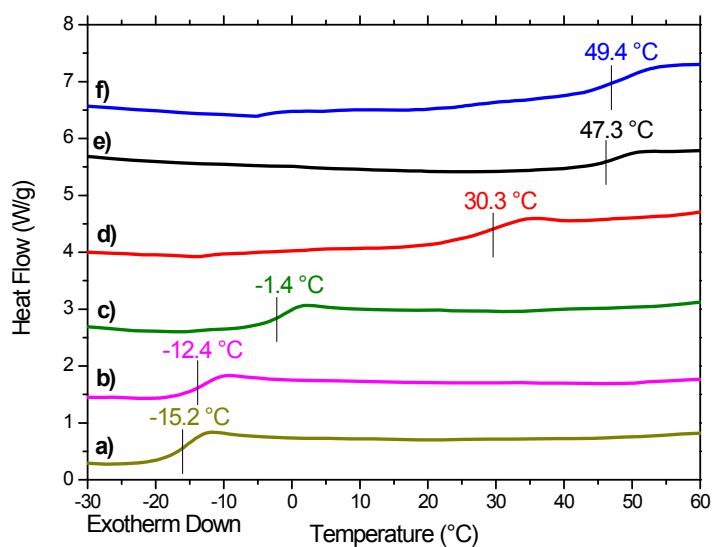

**Figure S16.** DSC curves of samples listed in Table 3: entry 22 (a), entry 23 (b), entry 24 (c), entry 25 (d), entry 26 (e), entry 27 (f).
